## **Comprehensive Analysis of Juvenile Nasopharyngeal Angiofibromas via Whole Exome Sequencing**

Short running title: "Exome analysis data uncover novel variants for JNA"

Kiran Kumari<sup>†1</sup>, PhD; Shariya Afroj<sup>†1</sup>, MSc; Deeksha Madhry<sup>1</sup>, MSc; Yash Verma<sup>2</sup>, MS; Arvind K. Kairo<sup>2</sup>, MS; Alok Thakar<sup>2</sup>, MS, FRCS; Kapil Sikka<sup>2</sup>, MS, DNB; Hitesh Verma<sup>2</sup>, MS, DNB, MBA; Bhupendra Verma<sup>1</sup>, PhD.

<sup>†</sup>Both the authors contributed equally and should be considered as joint first authors.

<sup>1</sup>Department of Biotechnology, All India Institute of Medical Sciences, Ansari Nagar, New Delhi -110029, India.

<sup>2</sup>Department of Otorhinolaryngology, All India Institute of Medical Sciences, Ansari Nagar, New Delhi -110029, India.

### **Corresponding Authors:**

**Bhupendra Verma**, PhD, Department of Biotechnology, All India Institute of Medical Sciences, Ansari Nagar, New Delhi -110029, India (bverma@aiims.edu, bverma@gmail.com), Tel: 91-11-26593617, Fax: 91-11-26588663.

**Hitesh Verma**, MS, DNB, MBA, Department of Otorhinolaryngology, All India Institute of Medical Sciences, Ansari Nagar, New Delhi -110029, India (drhitesh10@gmail.com), Tel: 91-11-26593617, Fax: 91-11-26588663, ORCID ID- 0000-0001-7905-3073.

## ABSTRACT

**Objectives:** The molecular basis and mechanisms of Juvenile Nasopharyngeal Angiofibromas (JNA) pathogenesis are still unknown. Despite being a rare and benign neoplasm, JNA is a locally aggressive and potentially destructive neoplasm among head and neck tumors, typically diagnosed in young males. The advancement of genome technologies and analytical tools has provided an unparalleled opportunity to explore the intricacy of JNA. The present study provides the first evidence of the involvement of chromosome Y genes in JNA.

**Methods:** Thirteen JNA patients at an advanced disease stage and 5 age-matched male controls were registered for this study. Whole-exome sequencing (WES) analysis was conducted followed by functional analysis to understand the molecular mechanism of the JNA.

**Results:** WES analysis revealed a high prevalence of mutations in 14 genes within the protein-coding, Male-Specific Region of the Y-chromosome of young males (mean age:  $13.8 \pm 2.4$ ) with JNA. These mutations, occurring at 28 distinct positions, were characterized as moderate to high impact and were prevalent in 9 JNA patients but not in the control group. The most frequently mutated genes were USP9Y and UTY, followed by KDM5D, DDX3Y and TSPY4. The expression of USP9Y, UTY and DDX3Y was found to be co-modulated, implying their coordinated regulation as a complex. Furthermore, somatic mutations were detected in genes previously linked to JNA.

**Conclusion:** The wide array of genetic and somatic mutations identified in JNA provides novel insight into JNA pathophysiology.

**Keywords:** Juvenile Nasopharyngeal Angiofibromas, Gender specificity, mutations, nasal obstruction, Whole exome sequencing (WES), Y-chromosome.

## INTRODUCTION

Juvenile Nasopharyngeal Angiofibroma (JNA) is a rare, benign yet rapidly expanding neoplasm found within the posterior nasal cavity and nasopharynx, posing a potential life-threatening risk due to severe hemorrhage. It constitutes roughly 0.05 to 0.5% of all head and neck tumors and affects only 1 in 150,000 individuals<sup>1</sup>. Primarily affecting adolescents and prepubescent males aged 10-20 years<sup>1,2</sup>, JNA displays a distinct male predominance. Very infrequently it appears in young or post-adolescent males<sup>3,4</sup>. Interestingly, reports suggest a comparatively higher incidence of JNA in the Indian subcontinent compared to the Western regions<sup>5</sup>. The factors underlying this increased prevalence of JNA in the Indian subcontinent remain elusive.

JNA typically presents sporadically with symptoms such as nasal obstruction and nosebleeds due to its location. Surgical resection, often through a multidisciplinary approach, is the primary treatment. Although it offers better survival outcomes, it is crucial to explore alternative approaches for approximately 37% of cases that are ineligible for surgery or exhibit residual conditions post-surgery<sup>6,7</sup>.

JNA is categorized into three types based on clinical and radiological features: Type I confined to nasal structures, Type II extending into facial regions, and Type III with a sizable tumor lobe in the middle cranial fossa<sup>3,8</sup>.

The exact cause of JNA remains elusive, with no hereditary pattern identified. There is a subtle increased risk in individuals with family members affected by familial adenomatous polyposis. Although predominantly occurring in adolescent boys, studies on hormonal influences in JNA have yielded inconclusive results<sup>2</sup>. JNA's molecular and genetic aspects are still evolving, with research highlighting factors contributing to the development of this rare tumor. Angiogenesis,

marked by Vascular Endothelial Growth Factor (VEGF) and other angiogenic factors, is a key feature in JNA<sup>9,10</sup>. Dysregulation of the Wnt/ $\beta$ -catenin pathway<sup>11-13</sup>, chromosomal abnormalities<sup>14,15</sup>, altered expression of microRNAs<sup>16</sup> and a potential association with human papillomavirus infection<sup>17</sup> have been implicated. However, comprehensive studies are crucial to better understand JNA's etiology, molecular pathogenesis, and sex specificity due to limited current evidence.

The aim of this study was to functionally characterize the mutational spectrum in JNA pathogenesis through whole-exome sequencing and identify the male-specificity of this disease through in-depth analysis of the Y-chromosome. Here, we report the presence of multiple mutations in the Y-chromosome genes that are involved in diverse biological functions, providing a framework for future study.

## **MATERIAL AND METHODS**

### ***Patient selection***

The study included 13 patients (JA\_1 to JA\_13) diagnosed with advanced-stage (based on Radkowski stage) Juvenile Nasopharyngeal Angiofibroma (JNA) at AIIMS, New Delhi. Five age-matched males served as controls. Clinicopathologic characteristics of JNA patients enrolled in the study are summarized in **Table 1**. Informed consent was obtained from all male participants. Blood samples collected from 2021 to 2022 were stored at -20°C. The study was conducted with approval from the Institutional Ethics Committee, AIIMS, New Delhi (IEC-494/06.08.2021, RP-31/2021), and the Institutional Biosafety Committee, AIIMS, New Delhi (IBSC 0621\_BV).

### ***Whole-exome sequencing (WES) and analysis***

Whole blood was used for DNA extraction, and WES data were generated using Illumina HiSeq at Clevergene Biocorp Private Limited, Bangalore, India. Details regarding DNA sequencing, data quality control, and variant selection and annotation are available in the **Method S1**. Variants present in the coding exons were considered for screening. For further analysis, variants were filtered by removing low-impact and modifier mutations, including synonymous, intronic, non-coding transcript exon, and down-stream gene variants. High-impact and moderate-impact variants were focused, which lead to stop gain, frameshift and missense variants. In order to explore mutations in the previously reported JNA-associated genes, a gene-list was compiled by reviewing literature with generally accepted functional evidence. The details of selected genes are provided in the **Table S7**. Variants were visualized using oncoPrint of ComplexHeatmap and a karyoplot/ideogram was created using the karyoploteR package (<https://www.r-project.org/>) in RStudio (<https://www.rstudio.com/>). The human protein-protein interaction network was constructed using the STRING database (version 12).

### ***Real-time polymerase chain reaction (RT-PCR)***

RNA was extracted from the patient's blood, followed by DNase treatment. PCR was carried out using gene-specific primers mentioned in **Table S1**. Details are provided in the **Method S1**. U1 snRNA was used as the normalization control. Densitometric analysis was performed using ImageJ software.

### ***Gene ontology and pathway enrichment analyses***

Gene Ontology (GO) and Kyoto Encyclopedia of Genes and Genomes (KEGG) pathway enrichment analysis was conducted using clusterProfiler implemented in the *gage* R Bioconductor package<sup>18</sup>. The GO analysis included cellular components (CC), biological

processes (BP), and molecular functions (MF). The GO terms and KEGG pathways with adjusted P-values  $\leq 0.05$  were considered significant for further analysis.

### *Statistical Analysis*

Statistical analyses were performed using the R software version 4.2.2, and statistical significance was set at a 2-tailed P-value of  $\leq 0.05$ . RT-PCR was performed in triplicates, and the statistical significance was determined using two-way ANOVA and the Graph Pad Prism software (Graph Pad Software Inc., San Diego, CA). P-value of  $\leq 0.05$  was considered significant. Error bars are expressed as Standard Error of the Mean (SEM).

## **RESULTS**

### *Patient Characteristics*

Thirteen patients aged between 10 and 18 years (mean age: 13.8 years) with advanced-stage JNA were analyzed alongside five male control subjects for WES. **Table 1** outlines the clinical features of patients such as tumor site, stage, surgical method, and recurrence. The study specifically focused on patients  $\leq 15$  years old, with most in advanced disease stages (Radkowski stage IIB-IIC for 9 patients, IIIA-IIIB for 4). Surgical preferences included 9 endoscopic and 4 open surgeries. Patient relapse was infrequent, and nearly all underwent preoperative embolization.

### *WES reveals mutations in genes located in the male-specific region on the Y-chromosome*

To understand the molecular pathophysiology and pathogenesis of JNA, we performed WES analysis on thirteen blood samples of JNA as compared to controls. In these samples, a total of 1133 mutations were identified on the Y-chromosome in 10 out of the 13 JNA cases. Somatic mutations were observed in the 3 patients where no mutations were detected on the Y-chromosome. These alterations were observed at 41 distinct chromosomal positions,

encompassing 4 indels and 37 Single Nucleotide Polymorphisms (SNPs). These mutations comprised 1 stop gained variant, 4 frameshift variants, 23 missense variants, 1 downstream gene variant, 7 non-coding transcript exon variants, 3 intron variants, and 2 synonymous variants. Multiple mutations were found per sample across 18 genes (**Figure 1**). The genes with mutational occurrences included: AMELY, DDX3Y, KDM5D, NLGN4Y, RBMY1F, RBMY1J, RPS4Y1, RPS4Y2, TBL1Y, TSPY1, TSPY2, TSPY3, TSPY4, TSPY8, TTTY14, USP9Y, UTY and ZFY. Notably, USP9Y and UTY were the most frequently mutated genes, harboring 11 and 5 mutations respectively. It is worth mentioning that these mutations were distributed throughout the entire length of the respective genes.

We then focused on variants in the coding region, including stop gained, frameshift, and missense variants found at 28 distinct positions across 14 genes among the 9 patients (**Figure 2 (A), Table S2**). Notably, frequently mutated genes were USP9Y (ubiquitin specific peptidase 9 Y-linked), and UTY (ubiquitously transcribed tetratricopeptide repeat containing, Y-linked), followed by KDM5D (lysine demethylase 5D), DDX3Y (DEAD-box helicase 3 Y-linked), and TSPY4 (testis specific protein Y-linked 4). Remarkably, within the patient cohort, 3 out of 9 cases exhibited USP9Y mutations at 7 chromosomal locations, including 1 stop gained and 6 missense mutations. Similarly, UTY mutations were observed in 4 out of 9 patients across 5 chromosomal positions, involving 2 frameshift and 3 missense mutations. In DDX3Y, mutations were observed in 2 out of 9 cases at 2 chromosomal locations, including 1 frameshift and 1 missense mutation (1 upstream gene variant was identified in patient ID JA\_2). Moreover, we observed a trend wherein cases at an advanced disease stage (IIIA/IIIB) exhibited a higher mutational burden of significant impact.

The genomic arrangement of these 14 mutated genes on Chromosome-Y has been graphically depicted in the **Figure 2 (B)**. Mapping the genomic sequence of these mutated genes from hg38 ChrY: 1112841602 – 25241578851 revealed a notable detail– these mutations predominantly manifested within the protein-coding male-specific region of Chromosome-Y (MSY). Further investigations revealed that RPS4Y1, AMELY, TBL1Y, TSPY4, TSPY8 and TSPY3 genes resided on the Gonadoblastoma locus of Chromosome-Y, whereas USP9Y, DDX3Y and UTY genes occupied the region designated for Azoospermia factor-a. Additionally, NLGN4Y, KDM5D, RPS4Y2, RBMY1F, and RBMY1J genes were situated within the Azoospermia factor-b region of Chromosome-Y.

### ***JNA mutant genes modulate various cellular functions***

GO and KEGG pathway analyses were conducted for functional enrichment of the 14 protein-coding mutated genes. The highly significant GO terms (adjusted p-value < 0.05) were selected for further analysis. Genes identified within the GO biological process (BP) category were predominantly associated with critical functions, including chromatin remodeling, protein demethylation, mesoderm development, protein dealkylation, gonad development, reproductive system development, demethylation, alternative mRNA splicing via spliceosome, histone modification, postsynaptic membrane assembly, and neuron cell-cell adhesion (**Figure S1**). In the GO cellular component category (CC), the genes primarily found in cytosolic small ribosomal subunit designation, indicating their involvement in fundamental cellular processes. Genes in the GO molecular function (MF) category was mainly linked to essential molecular activities such as demethylase activity, 2-oxoglutarate-dependent dioxygenase activity, histone binding, rRNA binding, structural constituent of ribosome, co-SMAD binding, and neurexin family protein binding. Notably, KEGG pathway analysis indicated a significant perturbation in



the Ribosome pathway, suggesting potential disruptions in protein synthesis machinery. The details of GO terms and KEGG pathways are shown in **Table S3-S6**.

### ***JNA mutations lead to altered expression of USP9Y, DDX3Y, and UTY genes***

Analysis with the STRING interactome database for the genes with high-impact variants revealed interactions between the USP9Y, DDX3Y, and UTY genes, forming a network (**Figure 3A**). Further investigation into these genes showed a significant modulation compared to the healthy control group. The levels of UTY, DDX3Y, and USP9Y were analyzed in the two patients (patient ID JA\_10 and JA\_2) through RT-PCR analysis. Patient JA\_10 had one frameshift mutation (high impact) in the UTY gene and one SNP mutation (moderate impact) in the DDX3Y gene. Patient JA\_2 had two SNP mutations, one in DDX3Y (modifier impact) and another in UTY genes (moderate impact). RT-PCR analysis suggested co-regulated modulation in the expression of UTY, DDX3Y and USP9Y genes. As a result of mutations in the UTY and DDX3Y genes, all three genes (UTY, DDX3Y, and USP9Y) were found to be downregulated in patient JA\_10 (**Figure 3B & C**), while in patient JA\_2 (**Figure 3D & E**), these genes were upregulated due to mutations in the same genes.

### ***Analysis of mutations in genes previously associated with JNA***

We explored the mutational spectrum of genes previously associated with the molecular and somatic facets of JNA. This comprehensive panel is composed of 37 genes, categorized into five distinct groups: (i) steroid hormones and receptors such as AR, ESR and PR; (ii) growth, proliferation and tissue remodeling factors and markers including VEGF, VEGFR, APC, E-cadherin, VWF and MK167; (iii) genetic targets pertinent to JNA, such as AURKA, CTCFL, GSTM1, k-ras, c-Myc, SYK and MDM2; (iv) molecular targets encompassing c-Myc, SDC2, TLR-3, TLR-9, and TNC; and (v) Genes associated with FAP, Beta-Catenin, and the Wnt

Signaling Pathway such as APC, AR, AXIN2, BMP4, E-cadherin, CTNNB1 and KDR. Upon rigorous data analysis, a spectrum of gene alterations emerged, manifesting in one or more cases of JNA (**Figure 4; Table S7**). In our scrutiny, we identified a total of 13 indels and 104 SNPs distributed across 117 distinct chromosomal positions among the 13 JNA patients. These alterations included both synonymous and non-synonymous mutations within the gene set. VWF had the highest frequency of mutations, followed by AXIN2, ESR2, CD34, MYC, APC, MKI67, TSHZ1, SYK, and TNC. After excluding non-synonymous mutations, the majority of the remaining mutations were missense alterations. Of particular interest, within MMP9, we identified a start loss in the sole identified transcript, indicating a loss of this protein function. Additionally, a stop loss mutation was observed in the SPARC gene. This comprehensive exploration of gene alterations enriches our understanding of JNA and sheds light on potential avenues for further investigation.

## DISCUSSION

JNAs are aggressive vascular tumors exclusive to adolescent males, and their exact pathogenesis remains unknown. To unravel the molecular mechanism behind their male predominance, we conducted the pioneering study analyzing mutations in Y-chromosome genes within the male-specific region through exome sequencing. Additionally, we have also reported the mutations associated with genes already established to be linked with JNA.

The mutated genes, primarily within the MSY region of the Y-Chromosome, are crucial for male-specific characteristics and reproduction. Enrichment of GO terms associated with reproductive processes suggests the involvement of TSPY3, TSPY4, and TSPY8<sup>19</sup> along with UTY, DDX3Y, USP9Y<sup>20</sup> KDM5D, RPS4Y (RPS4Y1, RPS4Y2), and RBMY1 (RBMY1F, RBMY1J)<sup>21,22</sup> in spermatogenesis and male infertility. Recent research highlights the

significance of Y-chromosome genes in influencing susceptibility to various diseases, including cancers and cardiovascular diseases, with implications beyond reproductive health. Vakilian *et al.*<sup>23</sup> observed increased expression of Y-linked genes (USP9Y, UTY, DDX3Y, RBMY1, and RPS4Y1) during neural cell differentiation. Elevated expression of USP9Y, DDX3Y, UTY, and RPS4Y1 in cardiovascular diseases<sup>24</sup> and RPS4Y1 and DDX3Y in neurodevelopmental and neurodegenerative disorders<sup>23</sup> has been documented. These findings suggest broader functions of these genes beyond sperm production regulation.

The most frequently mutated gene identified in our JNA WES analysis is USP9Y, which encodes a deubiquitinating enzyme. USP9Y plays a crucial role in the TGF-beta/BMP signaling cascade. Our study also observed downregulation of USP9Y, suggesting NMD pathway activation to mitigate the mutational effect. USP9Y is involved in regulating protein turnover and male germ cell development<sup>25,26</sup>. Recently Zhu *et al.*<sup>27</sup> connected USP9Y gene fusion with prostate cancer, implying that its deubiquitinating activity may impact JNA progression by modulating protein degradation pathways.

The present study identified the second most frequent mutation in UTY among the four cases examined. UTY encodes a male-specific histone demethylase responsible for the demethylation of H3K27me3 in DNA histone H3. The enrichment of GO terms under BP, such as histone lysine demethylation, histone demethylation, protein demethylation, and protein dealkylation supports this statement. Reduced expression of UTY was observed in this study. It also acts as a chaperone, and recently, deleterious missense variant was identified in the coding region of UTY genes through computational analysis<sup>28,29</sup>. UTY has been reported to be involved in prostate cancer<sup>30</sup> and urothelial bladder cancer<sup>31</sup>. UTY's homology with UTX and its epigenetic

functions suggest potential contributions to JNA development, particularly in terms of epigenetic modifications.

In KDM5D, a histone demethylase gene, we found three missense mutations related to epigenetic regulation. It is involved in chromosome condensation during meiosis and DNA repair. Downregulation of KDM5D is associated with increased invasiveness and metastasis in cancers<sup>32-34</sup>. Its loss, particularly in males with non-small-cell lung cancer, increases mortality risk and contributes to gender-based differences<sup>35</sup>. These mutations suggest a role in JNA development through epigenetic modifications.

The frameshift and missense mutation observed in DDX3Y suggest implication on different functions, as it is an RNA helicase involved in RNA metabolism. It is reported to regulate cell cycle progression in G1-S cell cycle phase via cyclin E1<sup>36</sup>. Lack of DDX3Y in males can lead to Sertoli Cell Only syndrome, impacting spermatogenesis<sup>37</sup>. Downregulation of DDX3Y has been reported in hepatocellular carcinoma (HCC)<sup>38</sup> and prostate cancer<sup>39</sup>, suggesting its involvement in cancer progression.

Missense or frameshift mutations were identified in several genes, including AMELY, KDM5D, NLGN4Y, RBMY1F, RBMY1J, RPS4Y1, RPS4Y2, TBL1Y, TSPY1, TSPY2, TSPY3, TSPY4, and TSPY8. NLGN4Y, implicated in synaptic functions, showed enrichment in gene ontology terms related to neural processes<sup>40</sup>. Its association with autism spectrum disorders suggests a potential role of the Y-chromosome in this condition<sup>41,42</sup>. RBMY1F and RBMY1J, involved in alternative mRNA splicing, have links to hepatocellular carcinoma through the Wnt/ $\beta$ -catenin pathway<sup>43,44</sup>. RPS4Y1 and RPS4Y2, encoding ribosomal proteins, play essential roles in protein synthesis. TBL1Y, a component of the nuclear receptor corepressor complex, suggests regulatory contributions to cancer-related processes. The TSPY gene family, acting as proto-oncogenes<sup>45,46</sup>

has implications in hepatocellular carcinoma and prostate cancer<sup>47-49</sup> suggesting their potential involvement in JNA development.

It is well-established that the USP9Y, UTY, and DDX3Y genes exhibit ubiquitous expression, with widespread effects beyond reproductive functions in sex organs. Maintaining dosage balance between MSY genes and their X homologs is crucial for men's overall health<sup>38</sup>. In this study, we observed co-expression of the UTY, DDX3Y, and USP9Y genes, which exhibited high-impact mutations in JNA patients. This finding aligns with the previously available reports documenting co-regulation of Chromosome-Y genes, including UTY and DDX3Y<sup>50</sup>. Interestingly, we observed an opposite co-expression pattern of these three genes in two JNA patients. The downregulation of gene expression in JA\_10 and upregulation in JA\_2, with Radkowski stage IIIB and IIB respectively, suggest their association with increased aggressiveness of the disease. Since the Y-chromosome is unique to men, these findings underscore the potential involvement of Y-chromosome genes in JNA development, highlighting their pivotal role in influencing susceptibility. Given that this study is the first of its kind, further research is crucial to unravel the precise roles of these genes in male-specific and gender-biased JNA development, progression, aggressiveness and outcome. Continued investigation will help to determine the clinical impact of Chromosome-Y genes and contribute to improved diagnostics and therapeutic strategies for JNA.

The study categorizes previously reported genetic markers associated with JNA into five groups based on types and functions. The first group, including AR, ESR1, and PR genes, crucial in sexual development, exhibits high-impact mutations in AR<sup>51</sup>, suggesting potential influences on cancer. The second group involves markers linked to growth, proliferation, and tissue remodeling, such as VEGF, VEGFR, APC, E-cadherin, VWF, and MKI67, providing insights

into vasculogenesis<sup>52</sup> angiogenesis, and tumorigenesis<sup>53</sup> VEGF is linked to high-vessel density in JNA<sup>54</sup> APC mutations, common in FAP-associated JNA, affect the Wnt pathway's involvement in JNA pathophysiology<sup>55</sup> E-cadherin mutations suppress tumors and are linked to various cancers<sup>56</sup> Notably, VWF and MKI67 mutations suggest links to JNA development as they are involved in maintaining vascular integrity and cell growth and proliferation<sup>10,57</sup>. The third group includes AURKA, c-Myc, CTCFL, MDM2, GSTM1, K-RAS, and SYK genes, pivotal in cell cycle regulation<sup>58</sup> and tumor progression<sup>59</sup>. The fourth group, featuring c-Myc, SDC2, TLR-3, TLR-9, and TNC genes, reveals diverse mechanisms such as regulation of cell cycle, cell adhesion and signaling, immune responses, and tissue homeostasis in JNA progression, with c-Myc and TNC showing high mutation frequencies<sup>12,60,61</sup>. The fifth group connects JNA with FAP, Beta-Catenin, and the Wnt Signaling Pathway through genes like APC, AR, AXIN2, BMP4, E-cadherin, CTNNB1, and KDR, emphasizing their crucial roles and interactions<sup>2,11,62</sup>. Additionally, variants in MMP9, CD34, ESR2, and TSHZ1 that are involved in the regulation of tissue development, repair, and homeostasis support their connection with JNA pathogenesis, offering potential therapeutic targets and enhancing our understanding of JNA.

## CONCLUSION

WES unveils the molecular mechanisms and sex specificity linked to JNA. Exploring mutations in the Y-chromosome male-specific region highlights the biological implications, emphasizing the significance of this chromosome in health and disease, particularly in cancer. Notably, specific mutation in UTY, USP9 and DDX3Y genes leads to their mutual alterations or co-regulated gene expression as observed in JNA patients, indicative of their involvement in JNA aggressiveness. Meanwhile, mutations in various genes like VEGF, APC, E-cadherin, and more

suggest a diverse range of genetic factors contributing to JNA. This research marks a promising avenue for understanding JNA pathogenesis, paving the way for improved prevention, prognosis, and treatment strategies.

## REFERENCES

1. Makhasana JAS, Kulkarni MA, Vaze S, Shroff AS. Juvenile nasopharyngeal angiofibroma. *Journal of Oral and Maxillofacial Pathology*. 2016;20(2):330. doi:10.4103/0973-029X.185908
2. Coutinho-Camillo CM, Brentani MM, Nagai MA. Genetic alterations in juvenile nasopharyngeal angiofibromas. *Head Neck*. 2008;30(3):390-400. doi:10.1002/hed.20775
3. Alshaikh NA, Eleftheriadou A. Juvenile nasopharyngeal angiofibroma staging: An overview. *Ear Nose Throat J*. 2015;94(6):E12-22. doi:10.1177/014556131509400615
4. Allensworth JJ, Troob SH, Lanciault C, Andersen PE. High-grade malignant transformation of a radiation-naïve nasopharyngeal angiofibroma. *Head Neck*. 2016;38:E2425-E2427. doi:10.1002/hed.24378
5. Biswas D, Saha S, Bera SP. Relative distribution of the tumours of ear, nose and throat in the paediatric patients. *Int J Pediatr Otorhinolaryngol*. 2007;71(5):801-805. doi:10.1016/j.ijporl.2007.01.021
6. Renkonen S, Hagström J, Vuola J, et al. The changing surgical management of juvenile nasopharyngeal angiofibroma. *European Archives of Oto-Rhino-Laryngology*. 2011;268(4):599-607. doi:10.1007/s00405-010-1383-z
7. Scholfield DW, Brundler MA, Mcdermott AL, Mussai F, Kearns P. *Adjunctive Treatment in Juvenile Nasopharyngeal Angiofibroma: How Should We Approach Recurrence?* Vol 38.; 2016. doi:10.1097/MPH.0000000000000524



8. Yi Z, Fang Z, Lin G, et al. Nasopharyngeal angiofibroma: A concise classification system and appropriate treatment options. *American Journal of Otolaryngology - Head and Neck Medicine and Surgery*. 2013;34(2):133-141. doi:10.1016/j.amjoto.2012.10.004
9. Liu Z, Wang J, Wang H, et al. Hormonal receptors and vascular endothelial growth factor in juvenile nasopharyngeal angiofibroma: Immunohistochemical and tissue microarray analysis. *Acta Otolaryngol*. 2015;135(1):51-57. doi:10.3109/00016489.2014.952774
10. Nonogaki S, Campos HGA, Butugan O, et al. Markers of vascular differentiation, proliferation and tissue remodeling in juvenile nasopharyngeal angiofibromas. *Exp Ther Med*. 2010;1(6):921-926. doi:10.3892/etm.2010.141
11. Behrens J, von Kries JP, Kühl M, et al. Functional interaction of  $\beta$ -catenin with the transcription factor LEF 1. *Nature*. 1996;382:638-642. doi:10.1038/382638a0
12. Doody J, Adil EA, Trenor CC, Cunningham MJ. The Genetic and Molecular Determinants of Juvenile Nasopharyngeal Angiofibroma: A Systematic Review. *Annals of Otolology, Rhinology and Laryngology*. 2019;128(11):1061-1072. doi:10.1177/0003489419850194
13. Barth AI, Näthke IS, Nelson WJ. Cadherins, catenins and APC protein: interplay between cytoskeletal complexes and signaling pathways. *Curr Opin Cell Biol*. 1997;9:683-690. doi:10.1016/S0955-0674(97)80122-6
14. Heinrich UR, Brieger J, Gosepath J, et al. Frequent chromosomal gains in recurrent juvenile nasopharyngeal angiofibroma. *Cancer Genet Cytogenet*. 2007;175(2):138-143. doi:10.1016/j.cancergencyto.2007.02.010

15. Schick B, Rippel C, Brunner C, et al. Numerical sex chromosome aberrations in juvenile angiofibromas: Genetic evidence for an androgen-dependent tumor? *Oncol Rep.* 2003;10:1251-1255.
16. LERNER C, WEMMERT S, SCHICK B. Preliminary analysis of different microRNA expression levels in juvenile angiofibromas. *Biomed Rep.* 2014;2(6):835-838. doi:10.3892/br.2014.350
17. Mishra A, Sachadeva M, Jain A, Shukla NM, Pandey A. Human Papilloma virus in Juvenile Nasopharyngeal Angiofibroma: possible recent trend. *American Journal of Otolaryngology - Head and Neck Medicine and Surgery.* 2016;37(4):317-322. doi:10.1016/j.amjoto.2016.03.001
18. Yu G, Wang LG, Han Y, He QY. ClusterProfiler: An R package for comparing biological themes among gene clusters. *OMICS.* 2012;16(5):284-287. doi:10.1089/omi.2011.0118
19. Vodicka R, Vrtel R, Dusek L, et al. TSPY gene copy number as a potential new risk factor for male infertility. *Reprod Biomed Online.* 2007;14(5):579-587. doi:10.1016/S1472-6483(10)61049-8
20. Krausz C, Degl'Innocenti S, Nuti F, et al. Natural transmission of USP9Y gene mutations: A new perspective on the role of AZFa genes in male fertility. *Hum Mol Genet.* 2006;15(18):2673-2681. doi:10.1093/hmg/ddl198
21. Vogt PH. Azoospermia factor (AZF) in Yq11: Towards a molecular understanding of its function for human male fertility and spermatogenesis. *Reprod Biomed Online.* 2005;10(1):81-93. doi:10.1016/S1472-6483(10)60807-3

22. Yan Y, Yang X, Liu Y, et al. Copy number variation of functional RBMY1 is associated with sperm motility: An azoospermia factor-linked candidate for asthenozoospermia. *Human Reproduction*. 2017;32(7):1521-1531. doi:10.1093/humrep/dex100
23. Vakilian H, Mirzaei M, Sharifi Tabar M, et al. DDX3Y, a male-specific region of y chromosome gene, may modulate neuronal differentiation. *J Proteome Res*. 2015;14(9):3474-3483. doi:10.1021/acs.jproteome.5b00512
24. Heidecker B, Lamirault G, Kasper EK, et al. The gene expression profile of patients with new-onset heart failure reveals important gender-specific differences. *Eur Heart J*. 2010;31(10):1165-1167. doi:10.1093/eurheartj/ehq073
25. Brown GM, Furlong RA, Sargent CA, et al. Characterisation of the coding sequence and fine mapping of the human DFFRY gene and comparative expression analysis and mapping to the Sxr b interval of the mouse Y chromosome of the Dffry gene. *Hum Mol Genet*. 1998;7(1):97-107. doi:10.1093/hmg/7.1.97
26. Lee KH, Song GJ, Kang IS, et al. Ubiquitin-specific protease activity of USP9Y, a male infertility gene on the Y chromosome. *Reprod Fertil Dev*. 2003;15(1-2):129-133. doi:10.1071/rd03002
27. Zhu Y, Ren S, Jing T, et al. Clinical utility of a novel urine-based gene fusion TTTY15-USP9Y in predicting prostate biopsy outcome. *Urologic Oncology: Seminars and Original Investigations*. 2015;33(9):384.e9-384.e20. doi:10.1016/j.urolonc.2015.01.019
28. Walport LJ, Hopkinson RJ, Vollmar M, et al. Human UTY(KDM6C) is a male-specific Nε-methyl lysyl demethylase. *Journal of Biological Chemistry*. 2014;289(26):18302-18313. doi:10.1074/jbc.M114.555052

29. Nailwal J, Chauhan MB. Computational Analysis of High Risk Missense Variant in Human UTY Gene: A Candidate Gene of AZFa Sub-region. *J Reprod Infertil.* 2017;18(3):298-306. <http://www.ebi.ac.uk/thornton-srv/software/PROCHECK/>
30. Dutta A, Le Magnen C, Mitrofanova A, Ouyang X, Califano A, Abate-Shen C. Identification of an NKX3.1-G9a-UTY transcriptional regulatory network that controls prostate differentiation. *Science* (1979). 2016;352(6293):1576-1580. doi:10.1126/science.aad9512
31. Ahn J, Kim KH, Park S, et al. Target sequencing and CRISPR/Cas editing reveal simultaneous loss of UTX and UTY in urothelial bladder cancer. *Oncotarget.* 2016;7(39):63252-63260. doi:10.18632/oncotarget.11207
32. Komura K, Jeong SH, Hinohara K, et al. Resistance to docetaxel in prostate cancer is associated with androgen receptor activation and loss of KDM5D expression. *Proc Natl Acad Sci U S A.* 2016;113(22):6259-6264. doi:10.1073/pnas.1600420113
33. Komura K, Yoshikawa Y, Shimamura T, et al. ATR inhibition controls aggressive prostate tumors deficient in Y-linked histone demethylase KDM5D. *The Journal of Clinical Investigation* . 2018;128(7):2979-2995. doi:10.1172/JCI96769DS1
34. Shen X, Hu K, Cheng G, et al. KDM5D inhibit epithelial-mesenchymal transition of gastric cancer through demethylation in the promoter of Cul4A in male. *J Cell Biochem.* 2019;120(8):12247-12258. doi:10.1002/jcb.27308
35. Willis-Owen SAG, Domingo-Sabugo C, Starren E, et al. Y disruption, autosomal hypomethylation and poor male lung cancer survival. *Sci Rep.* 2021;11(1). doi:10.1038/s41598-021-91907-8

36. Lai MC, Chang WC, Shieh SY, Tarn WY. DDX3 Regulates Cell Growth through Translational Control of Cyclin E1. *Mol Cell Biol.* 2010;30(22):5444-5453. doi:10.1128/mcb.00560-10
37. Lardone MC, Parodi DA, Valdevenito R, et al. Quantification of DDX3Y, RBMY1, DAZ and TSPY mRNAs in testes of patients with severe impairment of spermatogenesis. *Mol Hum Reprod.* 2007;13(10):705-712. doi:10.1093/molehr/gam057
38. Kido T, Lau YF. Roles of the Y chromosome genes in human cancers. *Asian J Androl.* 2015;17(3):373-380. doi:10.4103/1008-682X.150842
39. Khosravi P, Gazestani VH, Asgari Y, Law B, Sadeghi M, Goliaei B. Network-based approach reveals Y chromosome influences prostate cancer susceptibility. *Comput Biol Med.* 2014;54:24-31. doi:10.1016/j.combiomed.2014.08.020
40. Bottos A, Rissone A, Bussolino F, Arese M. Neurexins and neuroligins: Synapses look out of the nervous system. *Cellular and Molecular Life Sciences.* 2011;68(16):2655-2666. doi:10.1007/s00018-011-0664-z
41. Zhang C, Milunsky JM, Newton S, et al. A neuroligin-4 missense mutation associated with autism impairs neuroligin-4 folding and endoplasmic reticulum export. *Journal of Neuroscience.* 2009;29(35):10843-10854. doi:10.1523/JNEUROSCI.1248-09.2009
42. Serajee FJ, Huq AHMM. Association of Y chromosome haplotypes with autism. *J Child Neurol.* 2009;24(10):1258-1261. doi:10.1177/0883073809333530

43. Chua HH, Tsuei DJ, Lee PH, et al. RBMY, A Novel Inhibitor of Glycogen Synthase Kinase 3b, Increases Tumor Stemness and Predicts Poor Prognosis of Hepatocellular Carcinoma. 2015;100. doi:10.1002/hep.27996/supinfo
44. Kido T, Tabatabai ZL, Chen X, Lau YFC. Potential dual functional roles of the Y-linked RBMY in hepatocarcinogenesis. *Cancer Sci.* 2020;111(8):2987-2999. doi:10.1111/cas.14506
45. Oram SW, Liu XX, Lee TL, Chan WY, Lau YFC. TSPY potentiates cell proliferation and tumorigenesis by promoting cell cycle progression in HeLa and NIH3T3 cells. *BMC Cancer.* 2006;6. doi:10.1186/1471-2407-6-154
46. Li Y, Zhang DJ, Qiu Y, Kido T, Lau YFC. The Y-located proto-oncogene TSPY exacerbates and its X-homologue TSPX inhibits transactivation functions of androgen receptor and its constitutively active variants. *Hum Mol Genet.* 2017;26(5):901-912. doi:10.1093/hmg/ddx005
47. Kido T, Lau YFC. The Y-linked proto-oncogene TSPY contributes to poor prognosis of the male hepatocellular carcinoma patients by promoting the pro-oncogenic and suppressing the anti-oncogenic gene expression. *Cell Biosci.* 2019;9(1). doi:10.1186/s13578-019-0287-x
48. Leng X, Liu M, Tao D, et al. Epigenetic modification-dependent androgen receptor occupancy facilitates the ectopic TSPY1 expression in prostate cancer cells. *Cancer Sci.* 2021;112(2):691-702. doi:10.1111/cas.14731
49. Vijayakumar S, Hall DC, Reveles XT, et al. Detection of recurrent copy number loss at Yp11.2 involving TSPY gene cluster in prostate cancer using array-based comparative

- genomic hybridization. *Cancer Res.* 2006;66(8):4055-4064. doi:10.1158/0008-5472.CAN-05-3822
50. Deschepper CF. Regulatory effects of the Uty/Ddx3y locus on neighboring chromosome Y genes and autosomal mRNA transcripts in adult mouse non-reproductive cells. *Sci Rep.* 2020;10(1). doi:10.1038/s41598-020-71447-3
51. Davey RA, Grossmann M. Androgen Receptor Structure, Function and Biology: From Bench to Bedside. *Androgen Receptor Biology Clin Biochem Rev.* 2016;37(1):3-15.
52. Shibuya M. Vascular Endothelial Growth Factor (VEGF) and Its Receptor (VEGFR) Signaling in Angiogenesis: A Crucial Target for Anti- and Pro-Angiogenic Therapies. *Genes Cancer.* 2011;2(12):1097-1105. doi:10.1177/1947601911423031
53. Pećina-Šlaus N. Tumor suppressor gene E-cadherin and its role in normal and malignant cells. *Cancer Cell Int.* Published online 2003. doi:10.1186/1475-2867-3-17
54. Pandey P, Mishra A, Tripathi AM, et al. Current molecular profile of juvenile nasopharyngeal angiofibroma: First comprehensive study from India. *Laryngoscope.* 2017;127(3):E100-E106. doi:10.1002/lary.26250
55. Coutelier M, Hammer MB, Stevanin G, et al. Efficacy of exome-targeted capture sequencing to detect mutations in known cerebellar ataxia genes. *JAMA Neurol.* 2018;75(5):591-599. doi:10.1001/jamaneurol.2017.5121
56. Berx G, Becker KF, Höfler H, Van Roy F. Mutations of the Human E-Cadherin (CDH1) Gene. *Hum Mutat.* 1998;12(4):226-237. doi:10.1002/(SICI)1098-1004(1998)12:4<226::AID-HUMU2>3.0.CO;2-D

57. Uxa S, Castillo-Binder P, Kohler R, Stangner K, Müller GA, Engeland K. Ki-67 gene expression. *Cell Death Differ.* 2021;28(12):3357-3370. doi:10.1038/s41418-021-00823-x
58. Mou PK, Yang EJ, Shi C, Ren G, Tao S, Shim JS. Aurora kinase A, a synthetic lethal target for precision cancer medicine. *Exp Mol Med.* 2021;53(5):835-847. doi:10.1038/s12276-021-00635-6
59. Soltanian S, Dehghani H. BORIS: A key regulator of cancer stemness. *Cancer Cell Int.* 2018;18(1). doi:10.1186/s12935-018-0650-8
60. Ma L, Qin G, Gai F, et al. A novel method for early detection of colorectal cancer based on detection of methylation of two fragments of syndecan-2 (SDC2) in stool DNA. *BMC Gastroenterol.* 2022;22(1). doi:10.1186/s12876-022-02264-3
61. Sun M, Gomes S, Chen P, et al. RKIP and HMGA2 regulate breast tumor survival and metastasis through lysyl oxidase and syndecan-2. *Oncogene.* 2014;33(27):3528-3537. doi:10.1038/onc.2013.328
62. Abraham SC, Montgomery EA, Giardiello FM, Wu TT. Frequent-Catenin Mutations in Juvenile Nasopharyngeal Angiofibromas. *American Journal of Pathology.* 2001;158(3):1073-1078. doi:10.1016/s0002-9440(10)64054-0



## **STATEMENTS & DECLARATIONS**

### **AUTHOR CONTRIBUTIONS**

Dr. Bhupendra Verma and Dr. Hitesh Verma had full access to all the data in the study and take responsibility for the integrity of the data and the accuracy of the data analysis. Dr. Kiran Kumari and Shariya Afroj contributed equally to this study.

Concept and design: Dr. Bhupendra Verma and Dr. Hitesh Verma.

Acquisition, analysis, or interpretation of data: Dr. Kiran Kumari, Shariya Afroj, Deeksha Madhry, Dr. Bhupendra Verma and Dr. Hitesh Verma.

Drafting of the manuscript: Dr. Kiran Kumari, Shariya Afroj, Deeksha Madhry, Dr. Bhupendra Verma and Dr. Hitesh Verma.

Critical revision of the manuscript for important intellectual content: All authors.

Statistical analysis: Dr. Kiran Kumari, Shariya Afroj and Dr. Bhupendra Verma

Obtained funding: Dr. Bhupendra Verma and Dr. Hitesh Verma.

Administrative, technical, or material support: Dr. Bhupendra Verma and Dr. Hitesh Verma.

Supervision: Dr. Bhupendra Verma and Dr. Hitesh Verma.

### **ACKNOWLEDGEMENTS**

The authors are grateful to the patients and their families, as well as clinical and non-clinical staff at All India Institute of Medical Sciences, Ansari Nagar, New Delhi for their participation in the study. The authors also thank team from Clevergene Biocorp Pvt. Ltd., Bengaluru, India, for providing assistance with whole-exome sequencing. No compensation was received.

### **CONFLICT OF INTERESTS**

The authors declare no competing interests.

## **FUNDING**

This work is supported by the AIIMS Interdisciplinary Collaborative Intramural Research Project AC-31 (Dr. Bhupendra Verma and Dr. Hitesh Verma). The research in the Laboratory of Molecular Biology is supported by DST-SERB grant EEQ/2018/000838, EEQ/2022/000362 and DBT grant BT/PR39859/MED/29/1519/2020 (Dr. Bhupendra Verma). The funding organizations had no role in the design, conduct, data collection, analysis, interpretation, manuscript preparation, review, or approval, nor in the decision to submit the manuscript for publication.

## **DATA AVAILABILITY**

All data and materials described in this publication are included in the manuscript and additional supporting files. Raw datasets used and/or analyzed during the current study will be made available upon request to the corresponding authors.

## **ETHICS APPROVAL**

The study was conducted with approval from the Institutional Ethics Committee, AIIMS, New Delhi (IEC-494/06.08.2021, RP-31/2021), and the Institutional Biosafety Committee, AIIMS, New Delhi (IBSC 0621\_BV).

## **CONSENT TO PARTICIPATE**

Informed consent was obtained from all individual participants included in the study.

## **SUPPLEMENTARY INFORMATION**

The online version contains supplementary material.

## **FIGURE LEGENDS:**

**Figure 1. OncoPrint displays Y-chromosome germline mutations in JNA patients.** Total variants per patient are above the graph. The right bar graph represents the patient percentage with at least one variant in the indicated gene.

**Figure 2. Germline mutations with potential functional impact in JNA subjects. (A) Dot-plot** illustrates Y-chromosome gene variants in 9 patients. **(B) Schematic and ideograms of chromosome Y** showing these variants within the male-specific region of chromosome-Y.

**Figure 3. Functional analysis of USP9Y, UTY, and DDX3Y genes. (A) STRING interactome** revealed gene interactions. RT-PCR and densitometric analysis showing expression of genes in patient JA\_10 **(B and C)** and JA\_2 **(D and E)**.

**Figure 4. Somatic mutation spectrum of JNA.** Total variants identified for individual patients is displayed above the graph. The right bar graph shows the patient percentage with at least one variant in the indicated gene.

**Table 1.** Summary of clinical characteristics of the study participants with JNA<sup>#</sup>.

|                                     |                                   |             |
|-------------------------------------|-----------------------------------|-------------|
| <b>Symptoms</b>                     |                                   |             |
|                                     | Nasal bleed                       | 92 (12/13)  |
|                                     | Nasal obstruction                 | 85 (11/13)  |
|                                     | mass protruding through left nose | 15 (2/13)   |
|                                     | Headache                          | 8 (1/13)    |
|                                     | Cheek Swelling                    | 8 (1/13)    |
| <b>Anatomical site</b>              |                                   |             |
|                                     | Nasal cavity                      | 100 (13/13) |
|                                     | Nasopharynx                       | 92 (12/13)  |
|                                     | Sinus                             | 62 (8/13)   |
|                                     | Sphenopalatine foramen            | 23 (3/13)   |
|                                     | Pterygopalatine fossa             | 77 (10/13)  |
|                                     | Infratemporal fossa               | 54 (7/13)   |
|                                     | Pterygomaxillary fossa            | 15 (2/13)   |
| <b>Radkowski stage</b>              |                                   |             |
|                                     | I                                 | 0 (0/13)    |
|                                     | II                                | 69 (9/13)   |
|                                     | III                               | 31 (4/13)   |
| <b>Sphenoid bone invasion</b>       |                                   |             |
|                                     | No                                | 31 (4/13)   |
|                                     | Yes                               | 69 (9/13)   |
| <b>Preoperative embolization</b>    |                                   |             |
|                                     | No                                | 23 (3/13)   |
|                                     | Yes                               | 77 (10/13)  |
| <b>Surgical approach</b>            |                                   |             |
|                                     | Endoscopic                        | 69 (9/13)   |
|                                     | Open                              | 31 (4/13)   |
| <b>Intraoperative bleeding (mL)</b> |                                   |             |
|                                     | <500                              | 31 (4/13)   |
|                                     | 501 - 1000                        | 23 (3/13)   |
|                                     | >1001                             | 46 (6/13)   |
| <b>Recurrence</b>                   |                                   |             |
|                                     | No                                | 77 (10/13)  |
|                                     | Yes                               | 23 (3/13)   |

# values denoted as the percentage (round off to whole number) of patients presenting the clinical features; values in brackets indicates the number of patients showing the clinical sign in each category for which data is available.

# Figure 1

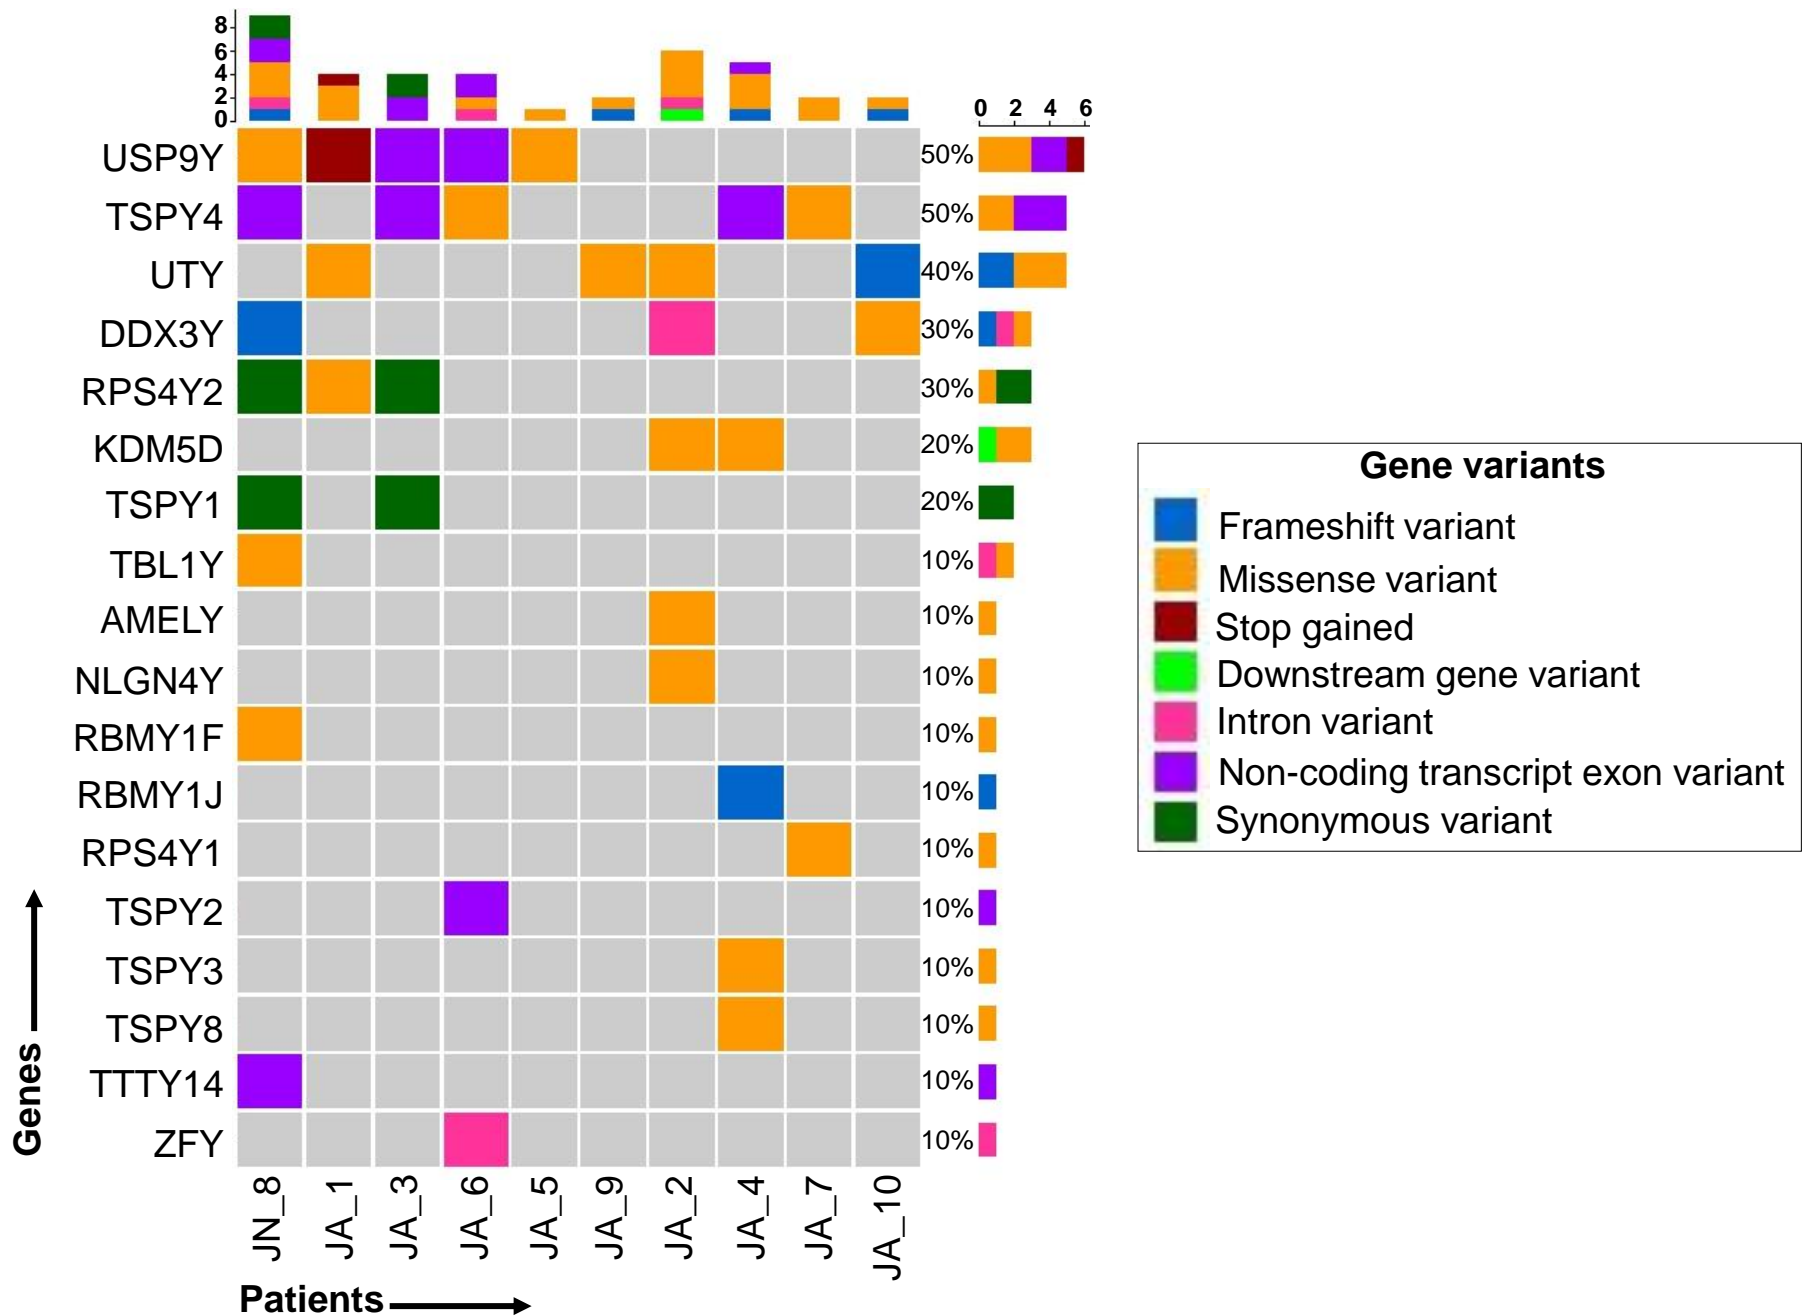

**Figure 2**

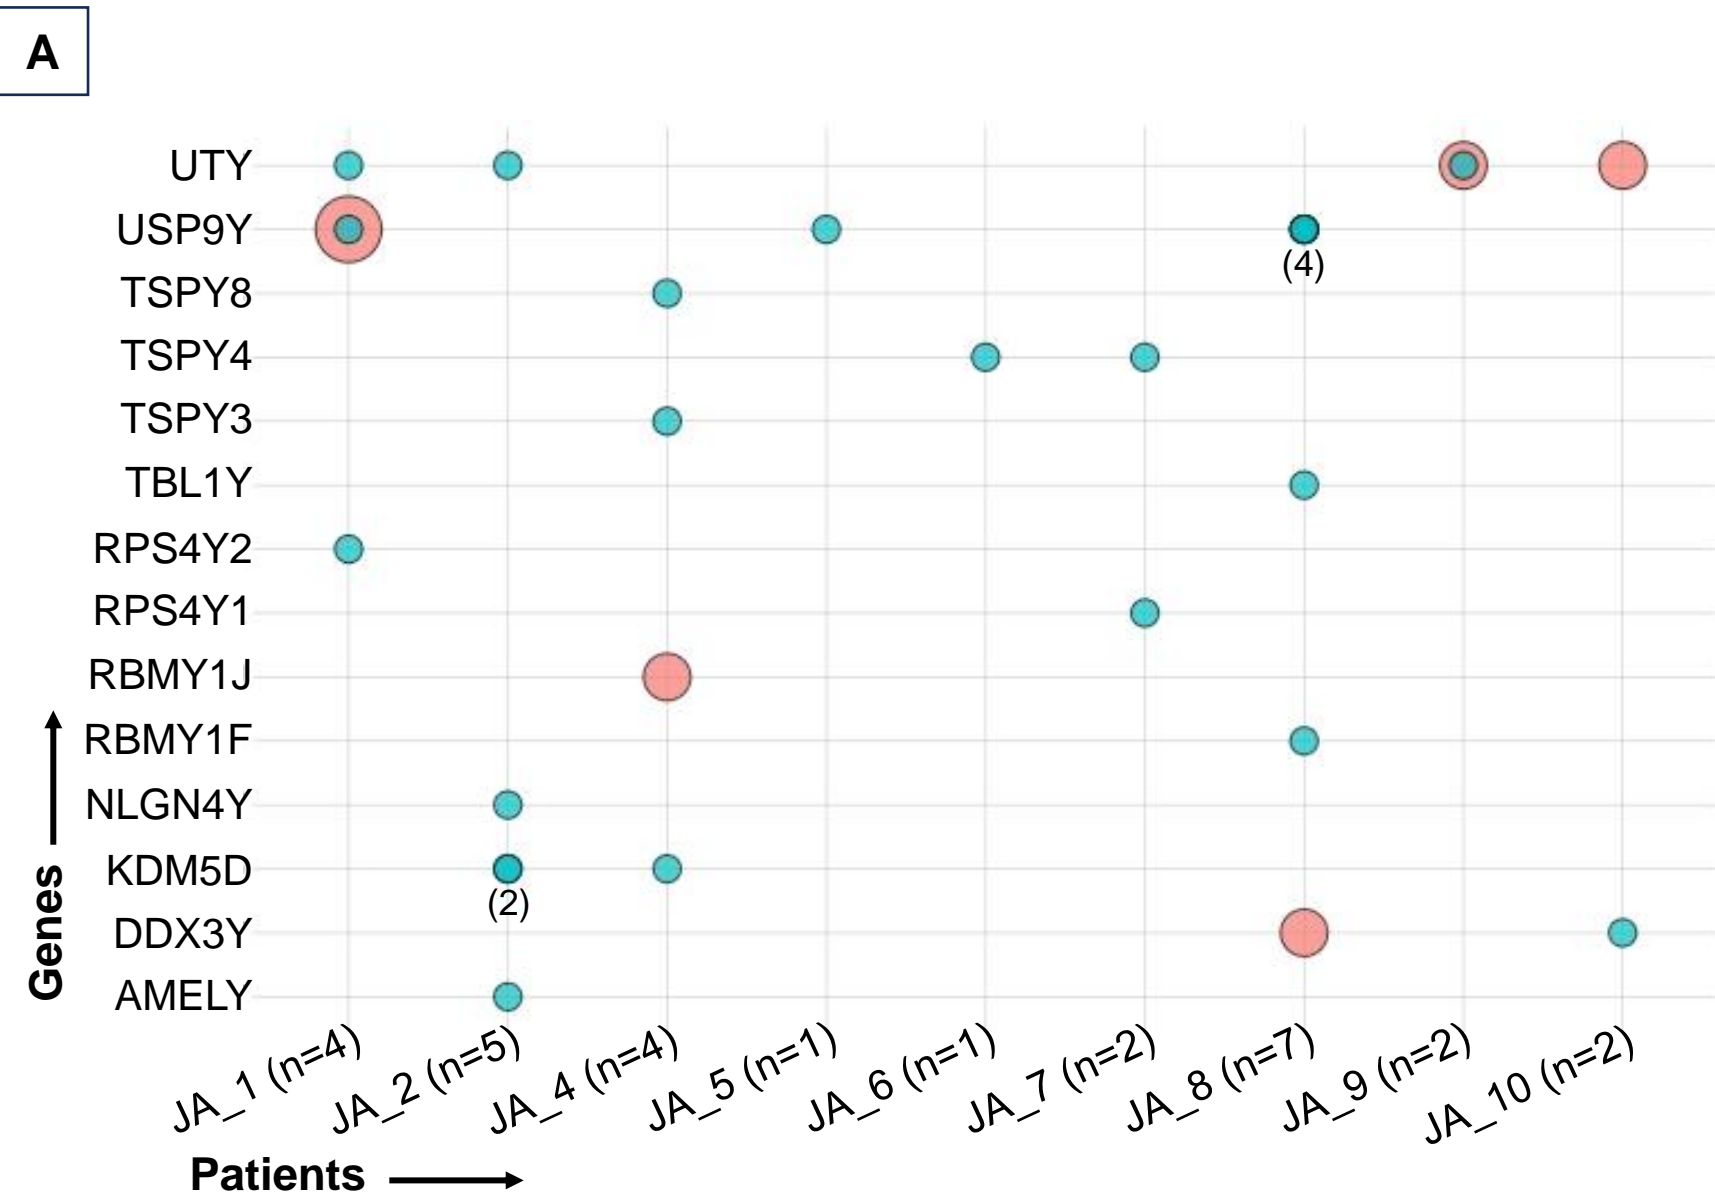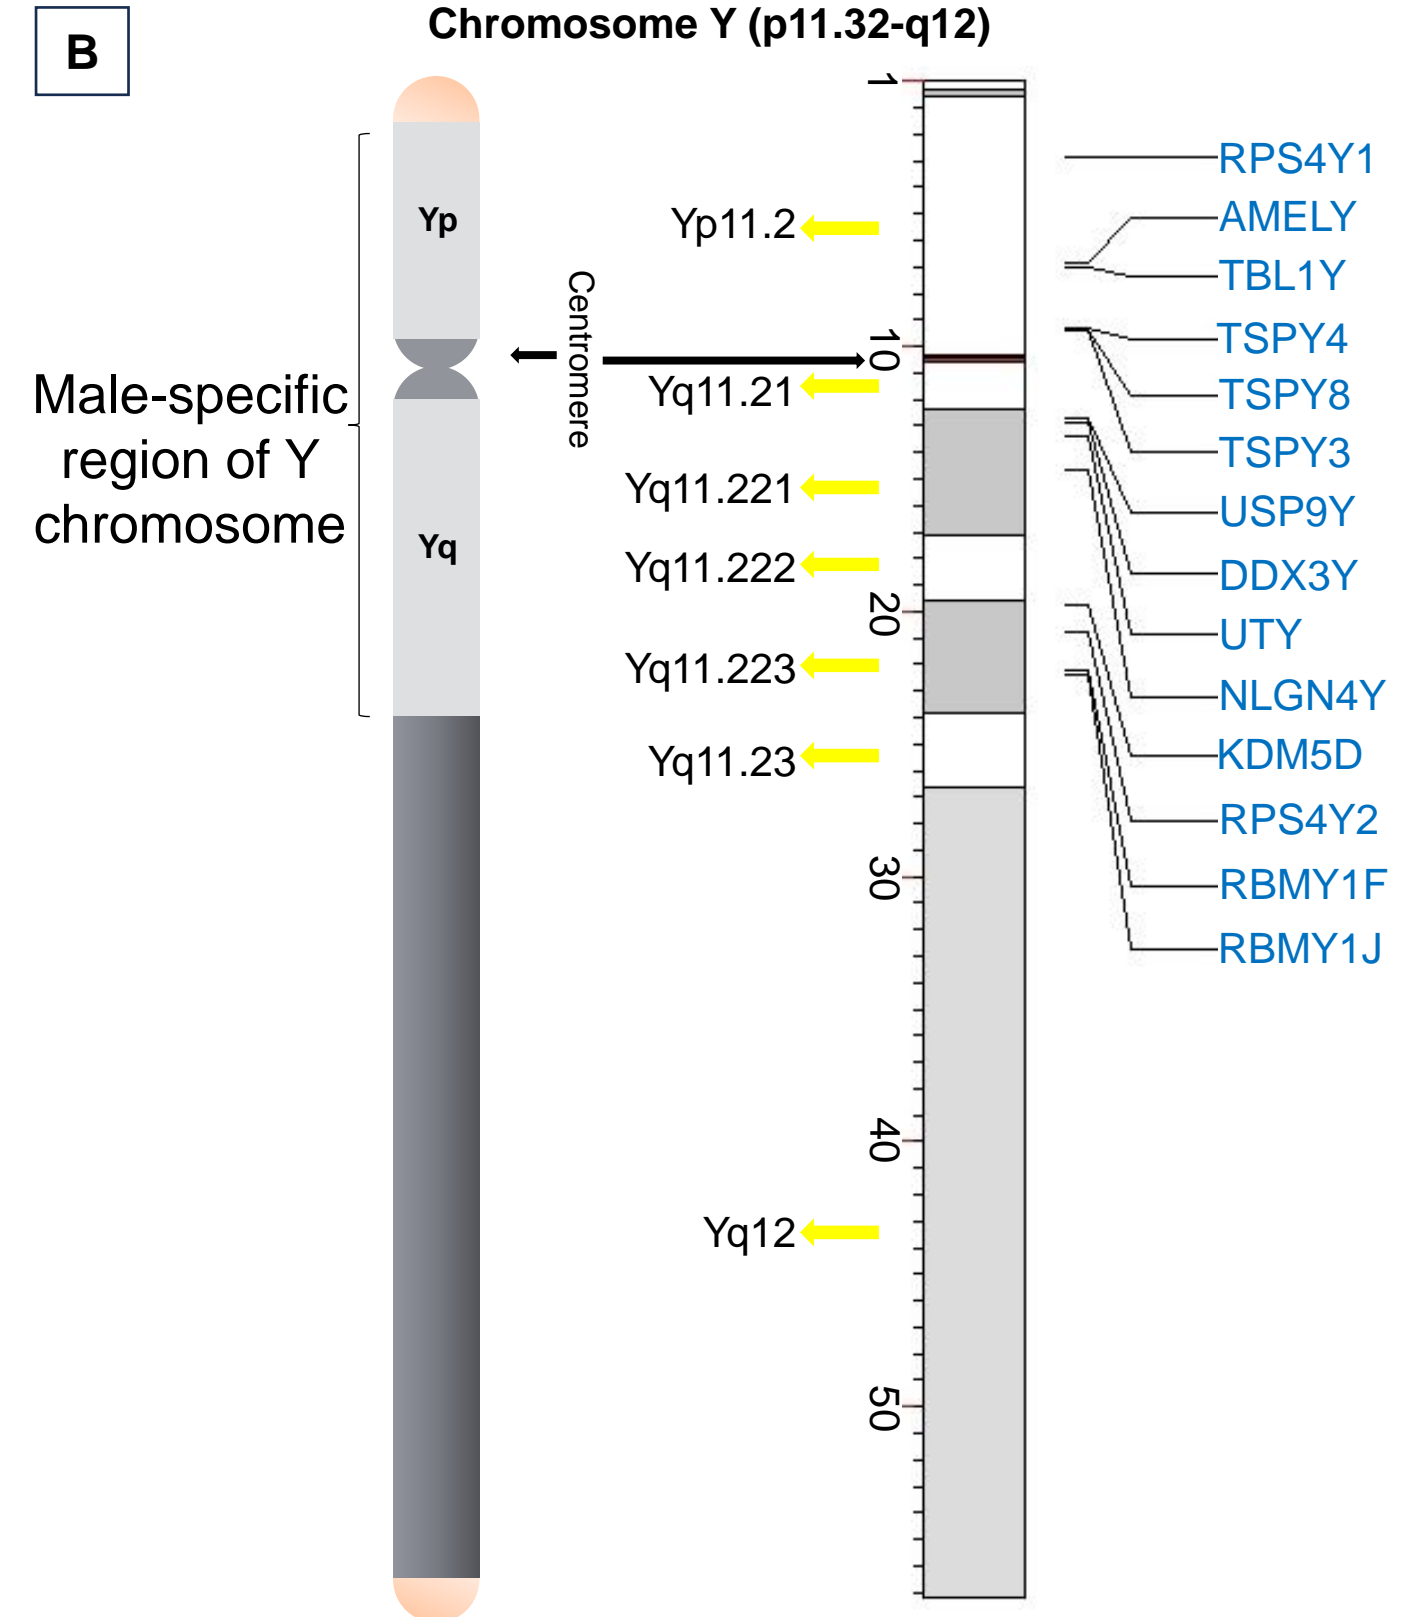

# Figure 3

**A**

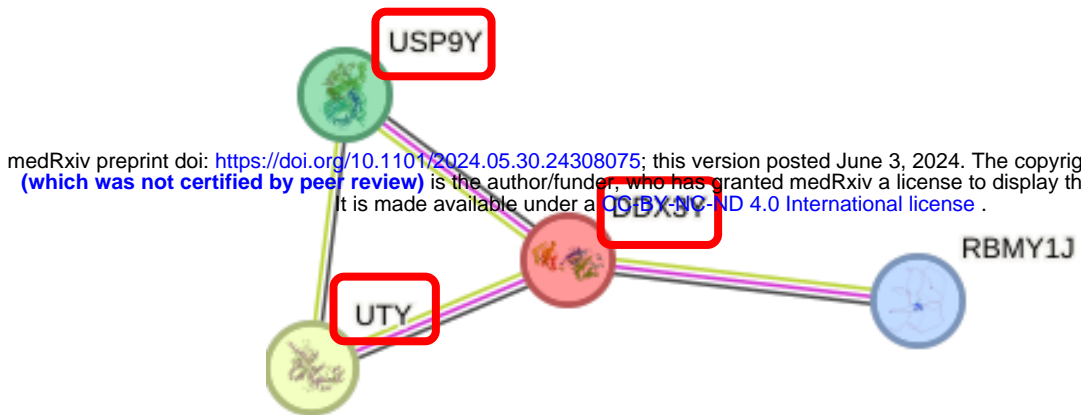

**B**

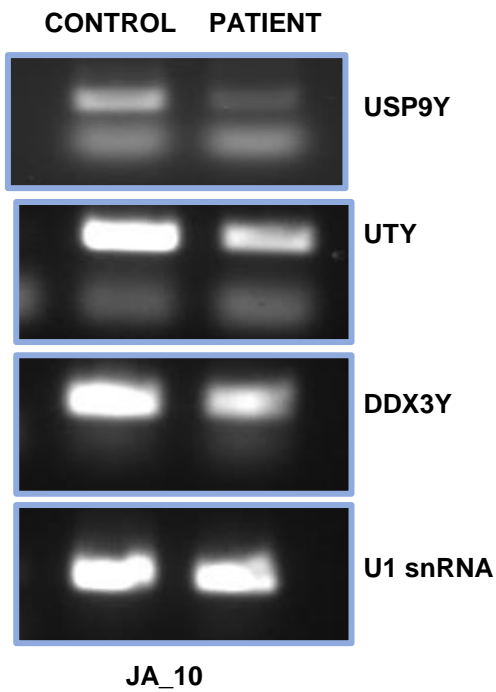

**D**

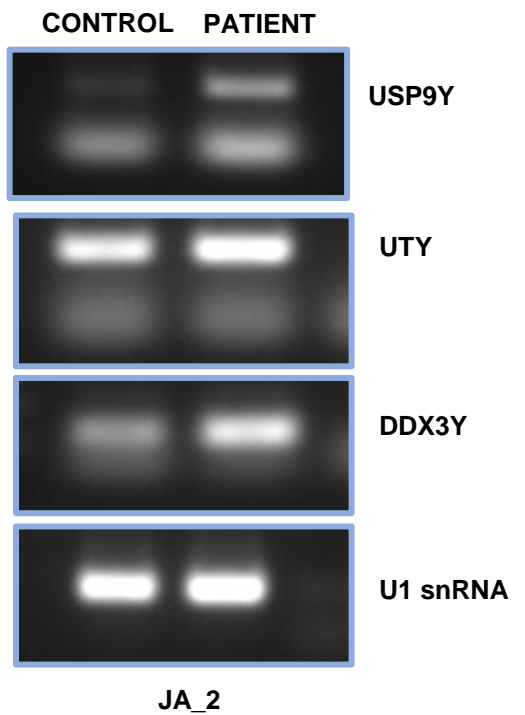

**C**

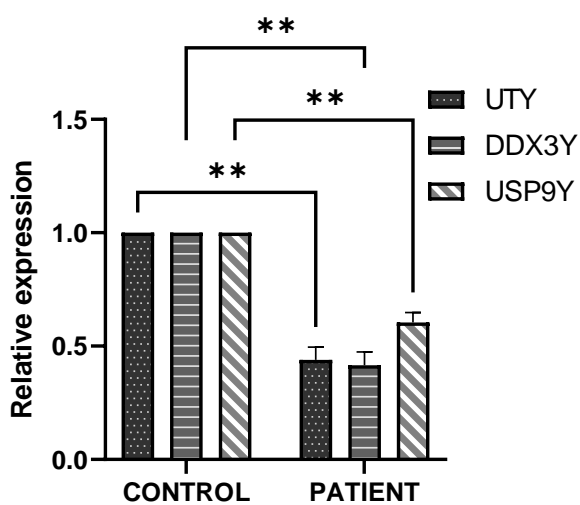

**E**

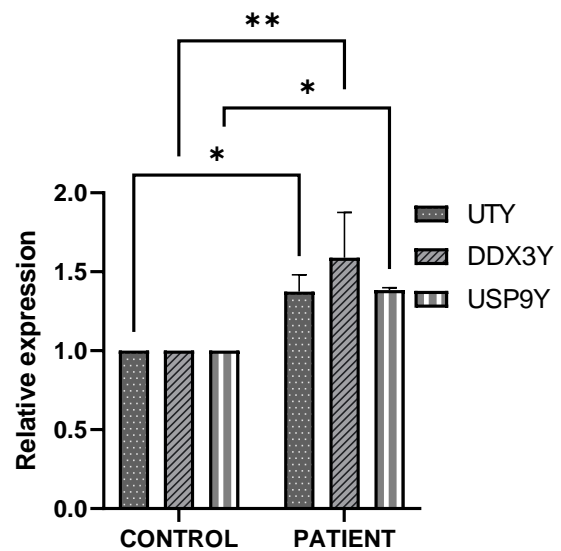

\*: P-value  $\leq .05$ , \*\*: P-value  $\leq .005$ . Error bars shows Mean $\pm$ SEM. U1 was used as normalization control.

# Figure 4

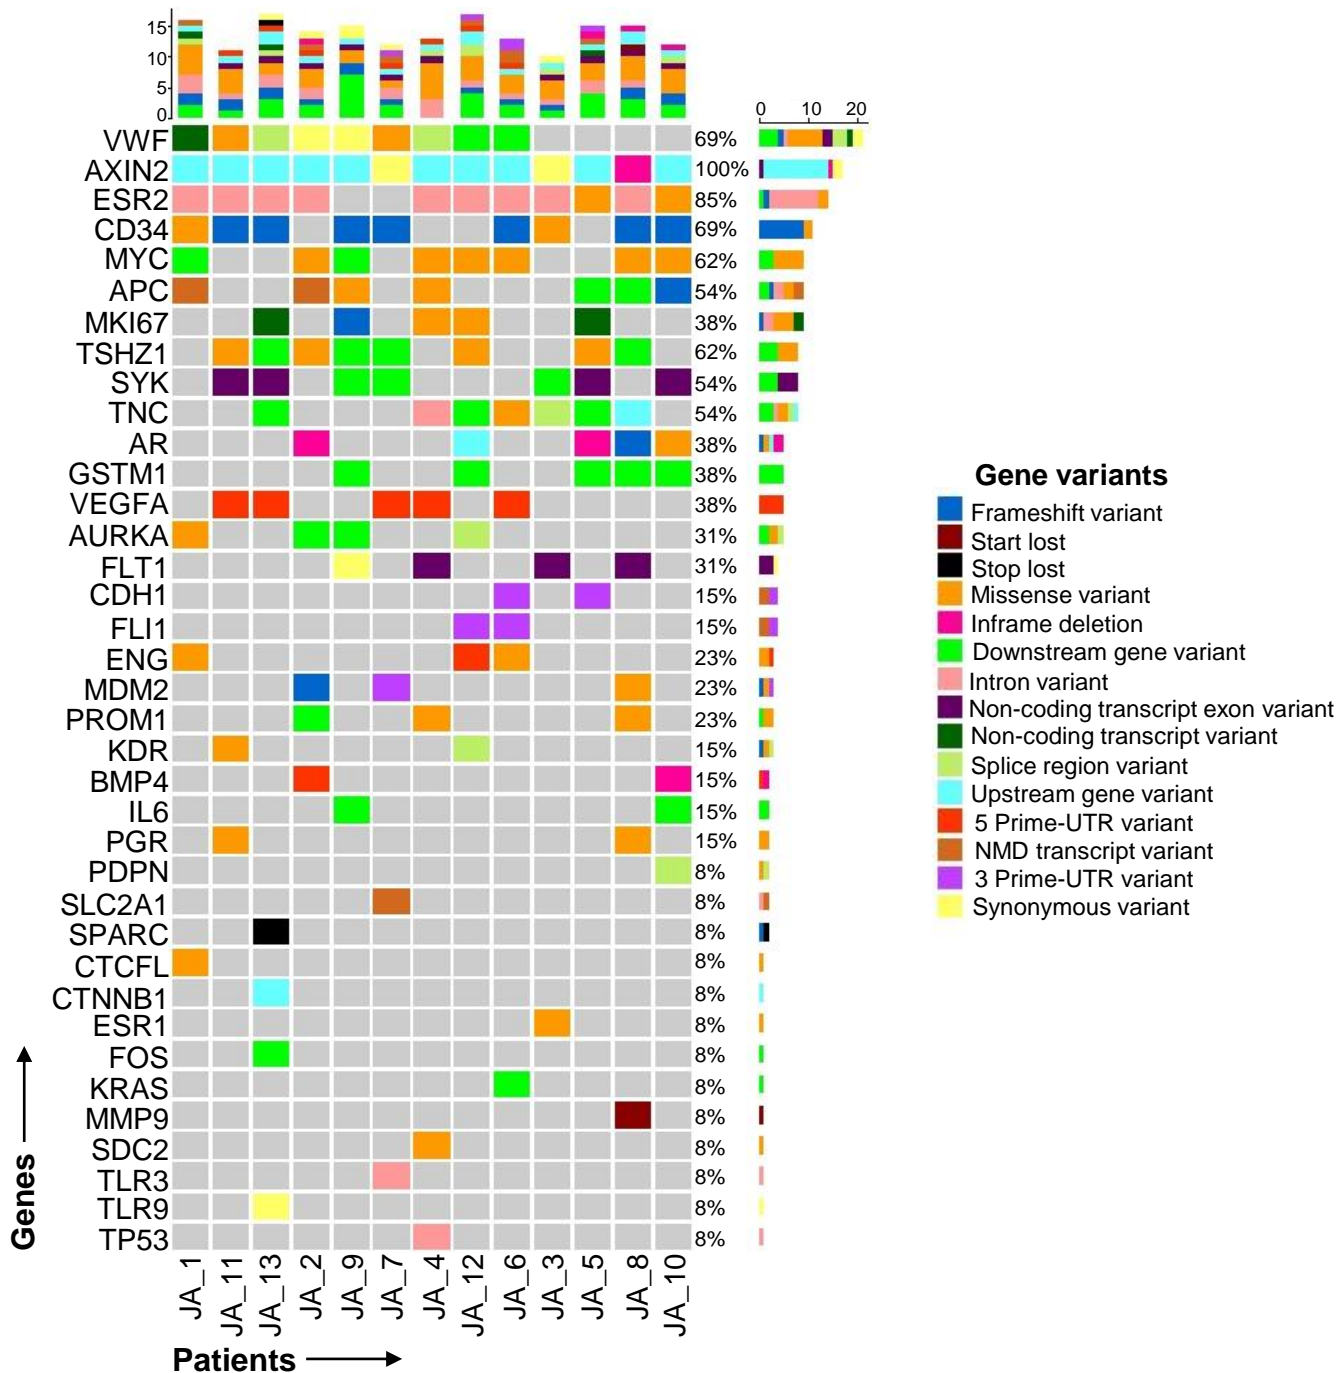

Source: https://medrxiv.org/content/medrxiv/early/2024/06/03/2024.05.30.24308075.full.pdf
